# Supplementary material for: Comparative study of single-nucleotide polymorphism array and next generation sequencing based strategies on triploid identification in preimplantation genetic diagnosis and screen
Source: PubMed Central journal article supplement (PMC5348434; doi:10.18632/oncotarget.13247), 2016-11-09
Supplement: oncotarget-07-81839-s001.pdf [file oncotarget-07-81839-s001.pdf]

# Comparative study of single-nucleotide polymorphism array and next generation sequencing based strategies on triploid identification in preimplantation genetic diagnosis and screen

## SUPPLEMENTARY FIGURE AND TABLES

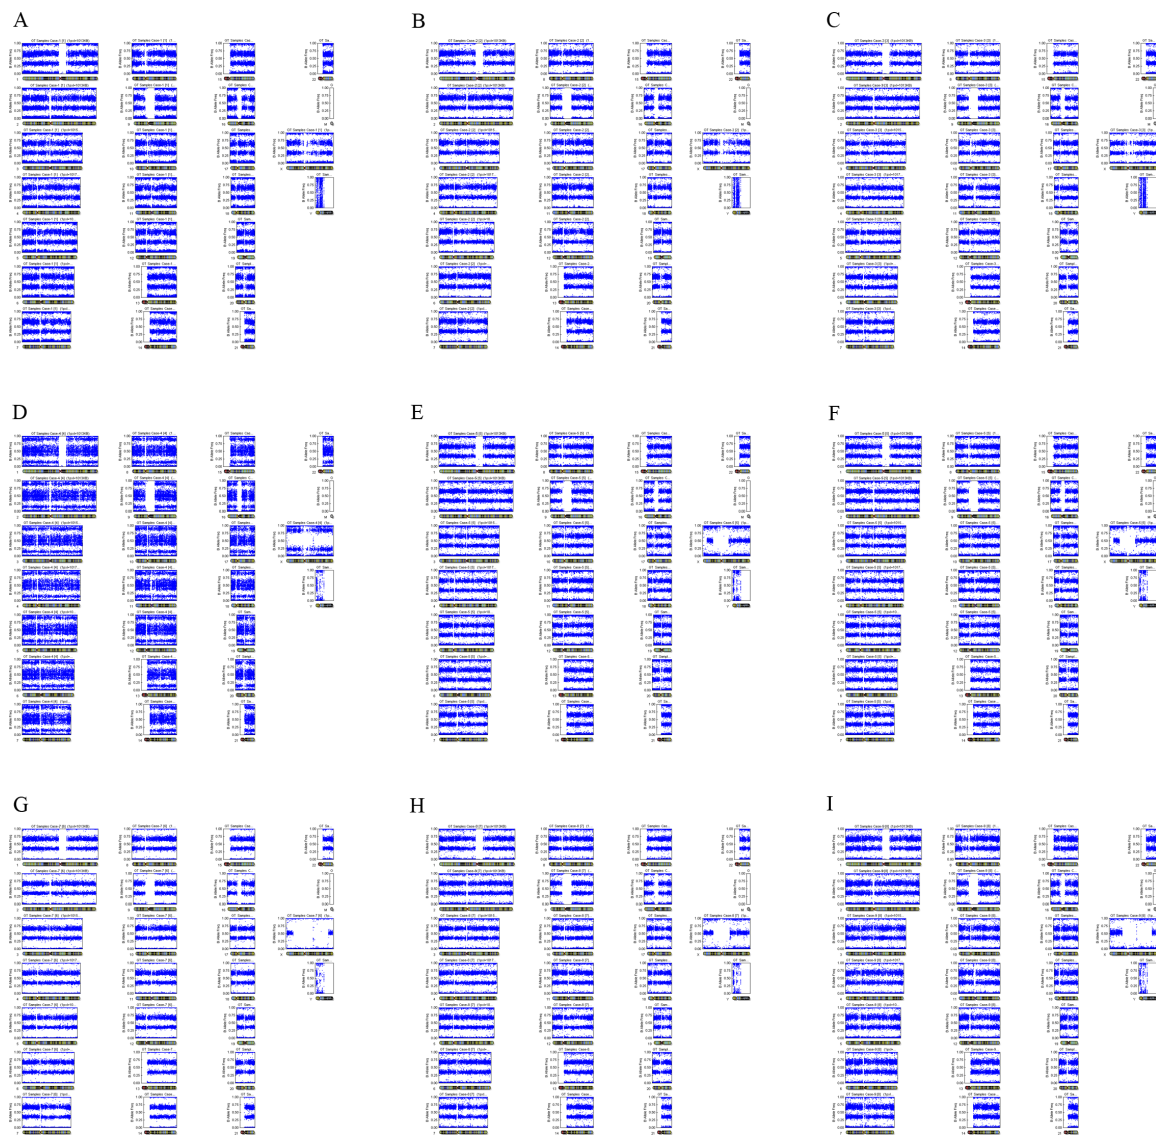

Supplementary Figure S1: Digyny and diandry triploidy detection using SNP array. A-C. arr (1-22)×3,(X)×3; D. 69,XYY, E-I. 69,XXY.

Supplementary Table S1: Basic statistical of MALBAC-NGS Data

| ID | Raw_reads | GC% | HQRs(HQRs/Raw reads) | MRs(MRs/HGRs)   | UMRs(UMRs/Raw reads) |
|----|-----------|-----|----------------------|-----------------|----------------------|
| S1 | 2,095,199 | 47  | 1,847,495(88.18%)    | 1700465(92.04%) | 1,423,957(67.96%)    |
| S2 | 1,659,345 | 48  | 1,476,884(89%)       | 1344292(91.02%) | 1,114,163(67.14%)    |
| S3 | 1,817,737 | 48  | 1,612,165(88.69%)    | 1477250(91.63%) | 1,258,078(69.21%)    |
| S4 | 1,046,231 | 48  | 934,879(89.36%)      | 834412(89.25%)  | 656,599(62.46%)      |
| S5 | 1,533,121 | 48  | 1,377,612(89.86%)    | 1259588(91.43%) | 1,013,801(66.13%)    |
| S6 | 65,951    | 48  | 58,857(89.24%)       | 52465(89.14%)   | 41,396(62.77%)       |
| S7 | 1,703,921 | 48  | 1,541,965(90.5%)     | 1418053(91.96%) | 1,108,233(65.04%)    |
| S8 | 1,492,861 | 48  | 1339568(89.73%)      | 1227843(91.66%) | 947,085(63.44%)      |
| S9 | 6,501,280 | 42  | 5,490,095(84.45%)    | 4836706(88.1%)  | 3,968,259(61.04%)    |

HQRs: high quality reads; MRs: Mapped\_reads; UMRs: Unique\_mapped\_reads.

Supplementary Table S2: Comparison of SNP array and NGS on detection of Triploid

| ID | SNP karyotype        | Putative Triploidy type | NGS karyotype (Self correction) | NGS karyotype (Relative correction) |
|----|----------------------|-------------------------|---------------------------------|-------------------------------------|
| 1  | arr (1-22)×3,(X)×3   | Digynic/Diandry         | 46,XX                           | 46,XX                               |
| 2  | arr (1-22)×3,(X)×3   | Digynic/Diandry         | 46,XX                           | 46,XX                               |
| 3  | arr (1-22)×3,(X)×3   | Digynic/Diandry         | 46,XX                           | 46,XX                               |
| 4  | arr (1-22)×3,(XXY)×1 | Digynic/Diandry         | 46,XY                           | 46,XY                               |
| 5  | arr (1-22)×3,(XXY)×1 | Digynic/Diandry         | 46,XY                           | 46,XY                               |
| 6  | arr (1-22)×3,(XXY)×1 | Digynic/Diandry         | Amplification failure           | Amplification failure               |
| 7  | arr (1-22)×3,(XYY)×1 | Diandry                 | 46,XY                           | 46,XY                               |
| 8  | arr (1-22)×3,(XYY)×1 | Diandry                 | 46,XY                           | 46,XY                               |
| 9  | arr (1-22)×3,(XXY)×1 | Diandry                 | 46,XY                           | 46,XY                               |
